# Supplementary material
Source: PubMed Central journal article supplement (PMC10134799)
Supplement: jvi.01907-22-s0001.pdf [file jvi.01907-22-s0001.pdf]

**A**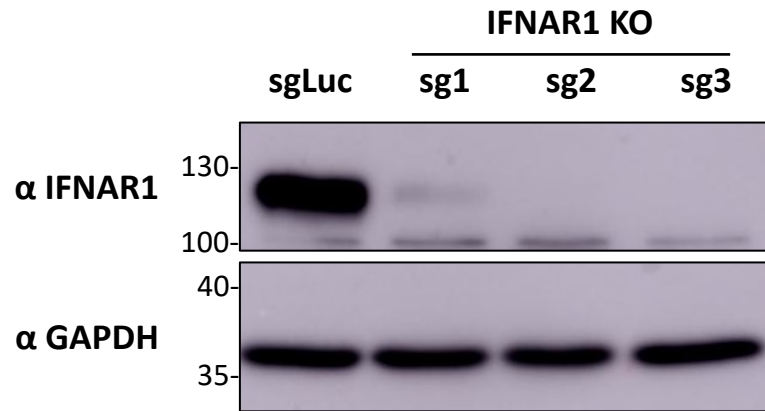**B**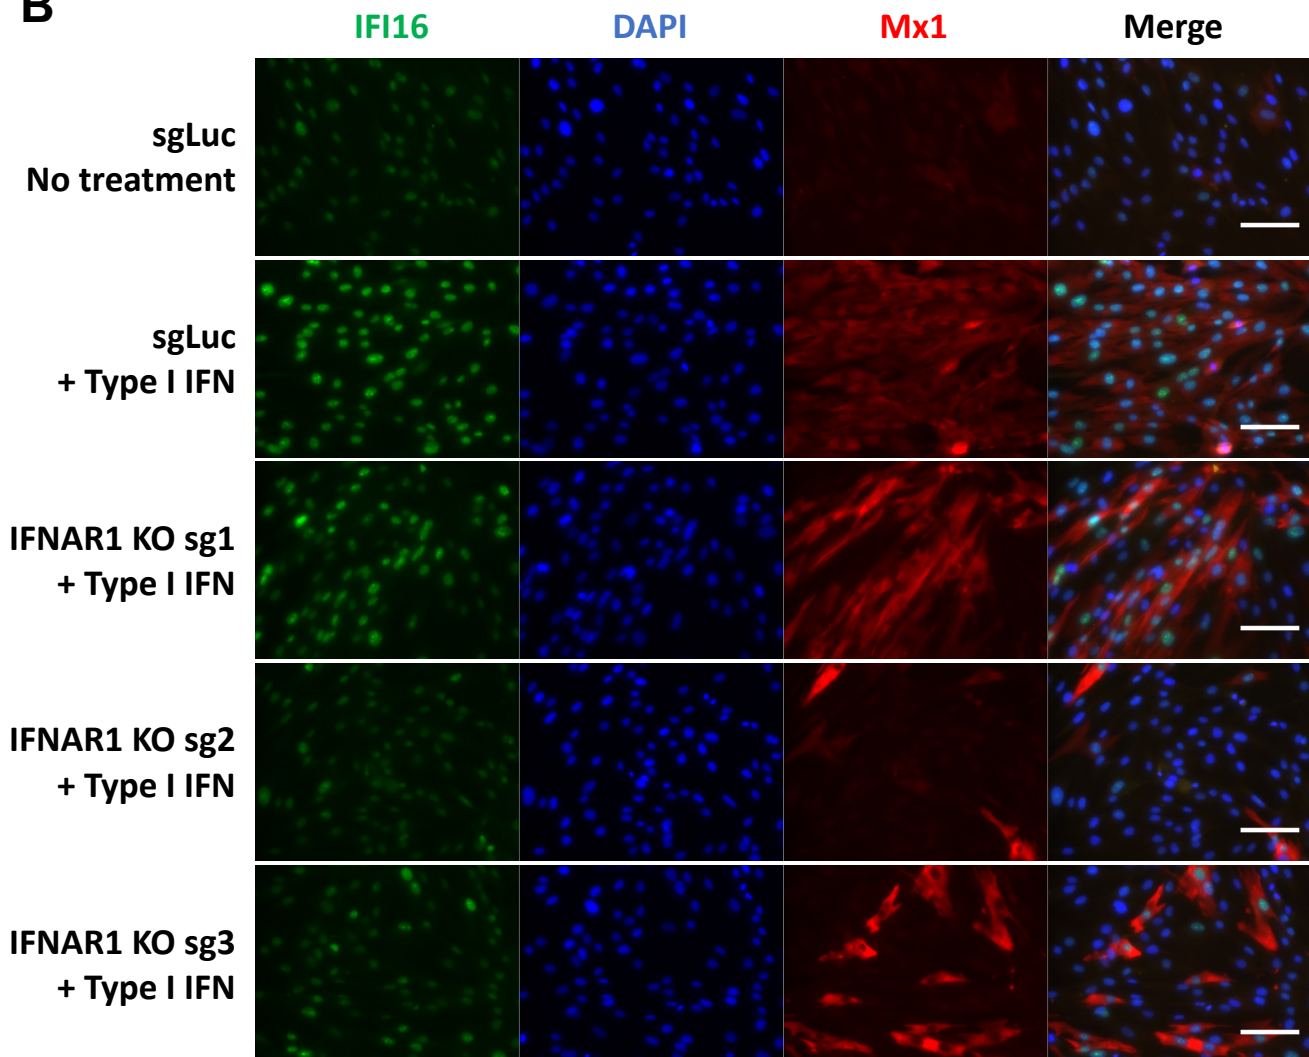

**Figure S1. Characterization of IFNAR1 CRISPR knockout (KO) HDF cells.** **A.** HDFs stably expressing Cas9 and a sgRNA targeting either the IFNAR1 gene (sg1, sg2, and sg3) or the nonmammalian luciferase gene (sgLuc) were immunoblotted for IFNAR1 and GAPDH. **B.** sgLuc or IFNAR1 KO sg1/2/3 HDF cells were treated with 500 U/ml type I IFN for 21 h, fixed, immunostained for IFI16 and Mx1, and counterstained with DAPI. Scale bar, 100  $\mu$ m.

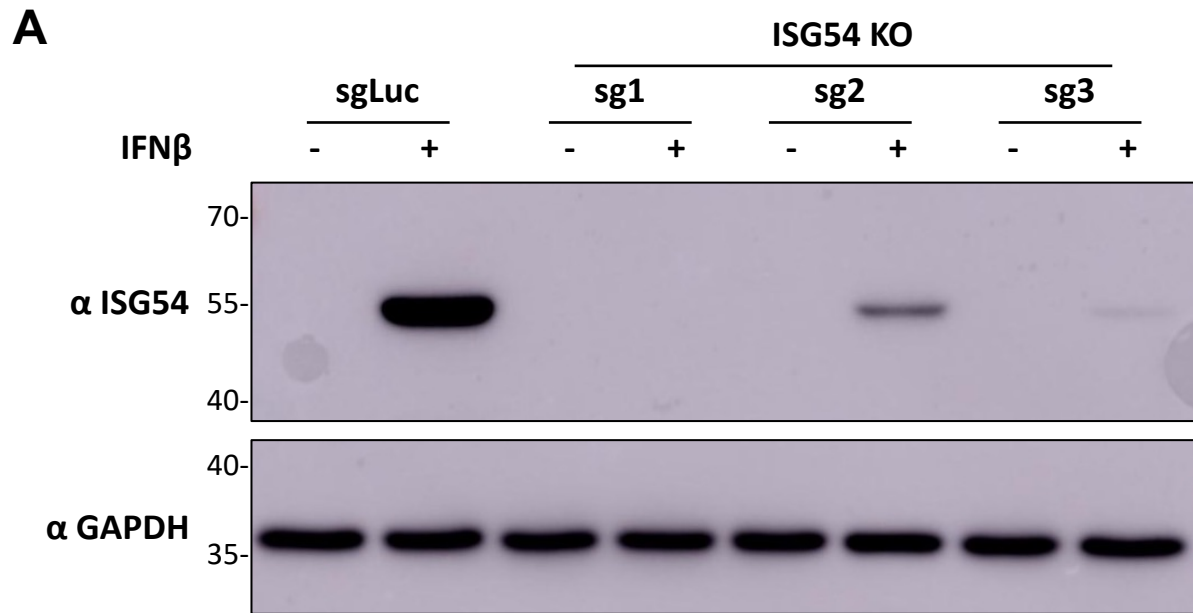

**B**

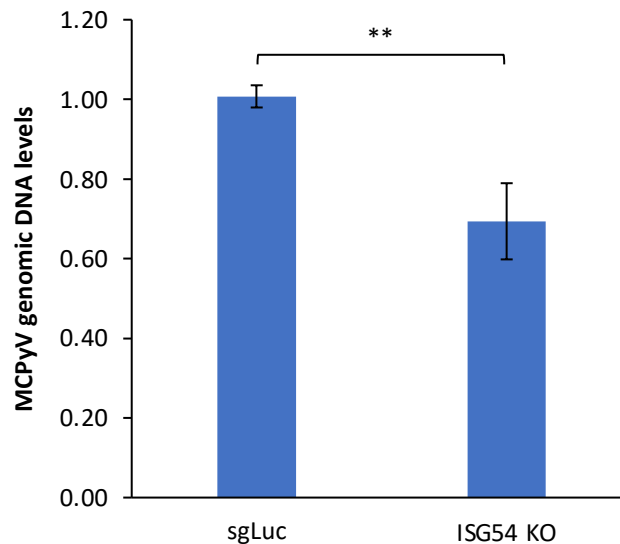

**Figure S2. ISG54 knockout does not significantly affect MCPyV infection.** **A.** HDFs stably expressing Cas9 and a sgRNA targeting either the ISG54 gene (sg1, sg2, and sg3) or the luciferase gene (sgLuc) were treated with IFN $\beta$  for 20 h and immunoblotted for ISG54 and GAPDH. **B.** MCPyV infected sgLuc or ISG54 KO (sg1) HDF cells were harvested for DNA extraction on day 5 post-infection. MCPyV genomic DNA levels were determined by qPCR quantification and normalized to the GAPDH genomic DNA levels. The value for one of the MCPyV-infected sgLuc HDF groups was set as 1. Error bars represent the standard deviation from three independent experiments. \*\* $p < 0.01$ .

**A**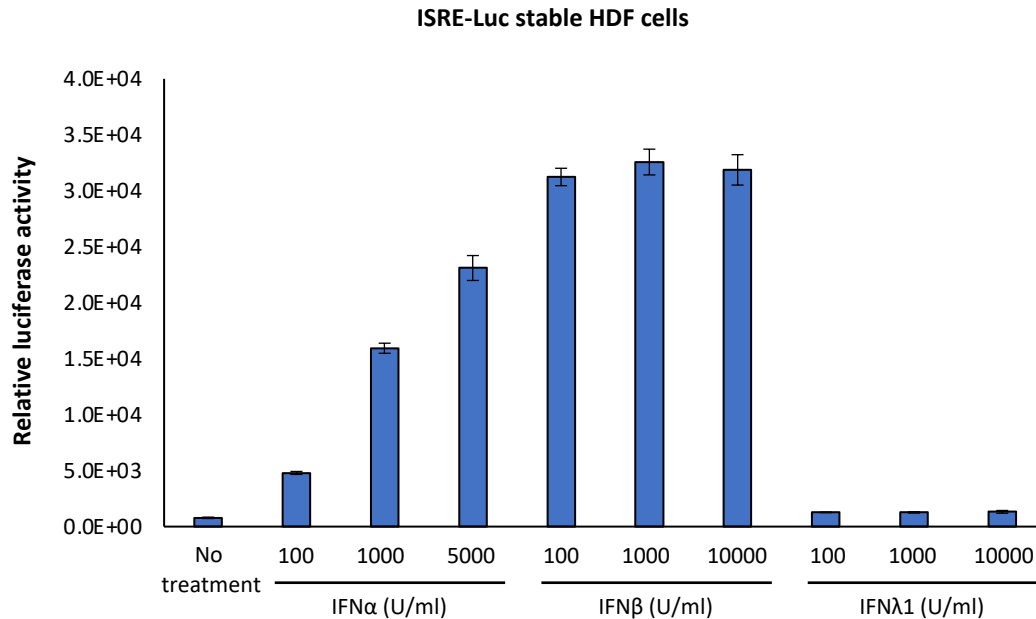**B**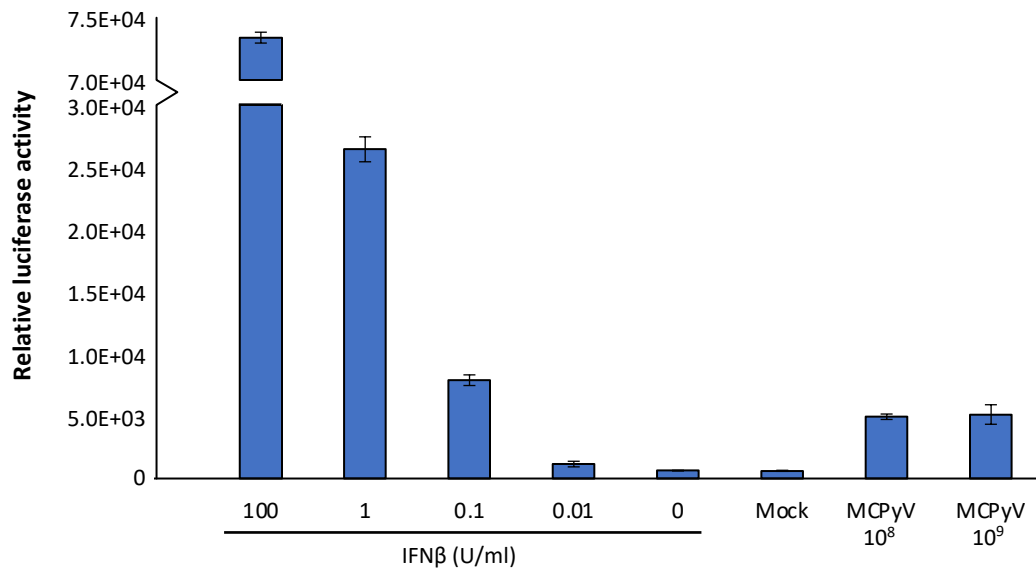

**Figure S3. Quantification of IFN $\beta$  induction by MCPyV infection.** **A.** HDF ISRE-Luciferase reporter stable cells were treated with the indicated doses of IFNs for 18h. Cell lysates were analyzed using luciferase assays. **B.** Cell culture medium collected from mock-infected HDFs or HDFs infected with  $10^8$  or  $10^9$  viral genome equivalents in each well of a 96-well plate were harvested on day 6 post-infection. The cell culture medium or different doses of IFN $\beta$  were used to treat HDF ISRE-Luciferase reporter stable cells for 6 h. Cell lysates were harvested for luciferase assays.
